# Supplementary material for: Scientific history, sampling approach, and physical characterization of the Camp Century subglacial material, a rare archive from beneath the Greenland Ice Sheet
Source: Copernicus journal article supplement (doi:10.5194/tc-18-4029-2024), 2024-09-05
Supplement: Supplementary file 1 [file tc-18-4029-2024-supplement.pdf]

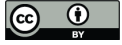

*Supplement of*

**Scientific history, sampling approach, and physical characterization of the Camp Century subglacial material, a rare archive from beneath the Greenland Ice Sheet**

**Paul R. Bierman et al.**

*Correspondence to:* Paul R. Bierman (pbierman@uvm.edu)

The copyright of individual parts of the supplement might differ from the article licence.



Table S2: Soil color

| Segment              | Exterior Photo |     |     |                        |                                   | Interior Cutface Photo |     |     |                        |                                   |
|----------------------|----------------|-----|-----|------------------------|-----------------------------------|------------------------|-----|-----|------------------------|-----------------------------------|
|                      | Average        |     |     | Equivalent<br>HEX code | Best fit<br>Munsell<br>soil color | Average                |     |     | Equivalent<br>HEX code | Best fit<br>Munsell<br>soil color |
|                      | R              | G   | B   |                        |                                   | R                      | G   | B   |                        |                                   |
| 1059-4               | 116            | 107 | 94  | 746B5E                 | 5Y 4/2                            | 146                    | 148 | 147 | 929493                 | 7.5G 6/2                          |
| 1059-5               | 127            | 121 | 113 | 7F7971                 | 5Y 5/2                            | 94                     | 90  | 80  | 5E5A50                 | 7.5Y 4/2                          |
| 1059-6               | 115            | 106 | 90  | 736A5A                 | 5Y 4/2                            | 105                    | 93  | 81  | 695D51                 | 2.5Y 4/2                          |
| 1059-7               | 127            | 118 | 106 | 7F766A                 | 5Y 5/2                            | 105                    | 93  | 81  | 695D51                 | 2.5Y 4/2                          |
| 1060-A1              | 72             | 61  | 40  | 483D28                 | 5Y 3/2                            | 81                     | 72  | 59  | 51483B                 | 5Y 3/2                            |
| 1060-A2              | 136            | 131 | 119 | 888377                 | 10Y 5/2                           | 94                     | 85  | 73  | 5E5549                 | 7.5Y 4/2                          |
| 1060-B <sup>a</sup>  |                |     |     |                        |                                   |                        |     |     |                        |                                   |
| 1060-C1              | 126            | 126 | 120 | 7E7E78                 | 2.5GY 5/2                         | 94                     | 92  | 85  | 5E5C55                 | 2.5GY 4/2                         |
| 1060-C2              | 123            | 118 | 107 | 7B766B                 | 10Y 5/2                           | 90                     | 85  | 65  | 5A5541                 | 10Y 3/2                           |
| 1060-C3              | 106            | 96  | 81  | 6A6051                 | 5Y 4/2                            | 90                     | 85  | 65  | 5A5541                 | 10Y 3/2                           |
| 1060-C4              | 114            | 96  | 73  | 726049                 | 2.5Y 4/2                          | 87                     | 73  | 49  | 574931                 | 5Y 3/2                            |
| 1060-C5              | 120            | 91  | 61  | 785B3D                 | 10YR 4/4                          | 118                    | 86  | 51  | 765633                 | 10YR 4/4                          |
| 1061-A               | 127            | 119 | 100 | 7F7764                 | 7.5Y 5/2                          | 134                    | 99  | 46  | 86632E                 | 10Y 3/2                           |
| 1061-B <sup>b</sup>  |                |     |     |                        |                                   |                        |     |     |                        |                                   |
| 1061-C               | 108            | 104 | 93  | 6C685D                 | 2.5GY 4/2                         | 135                    | 119 | 78  | 87774E                 | 7.5Y 5/4                          |
| 1061-D1              | 160            | 150 | 128 | A09680                 | 7.5Y 6/2                          | 131                    | 115 | 68  | 837344                 | 7.5Y 5/4                          |
| 1061-D2              | 113            | 100 | 71  | 716447                 | 5Y 4/2                            | 98                     | 88  | 54  | 625836                 | 7.5Y 4/4                          |
| 1061-D3              | 88             | 80  | 65  | 585041                 | 7.5Y 3/2                          | 101                    | 88  | 47  | 65582F                 | 7.5Y 4/4                          |
| 1061-D4 <sup>c</sup> |                |     |     |                        |                                   |                        |     |     |                        |                                   |
| 1061-D5              | 114            | 114 | 108 | 72726C                 | 2.5GY 5/2                         | 128                    | 110 | 72  | 806E48                 | 5Y 5/4                            |
| 1062-1               | 104            | 96  | 71  | 686047                 | 7.5Y 4/2                          | 115                    | 113 | 108 | 73716C                 | 2.5GY 5/2                         |
| 1062-2               | 125            | 112 | 92  | 7D705C                 | 5Y 5/2                            | 109                    | 109 | 106 | 6D6D6A                 | 2.5GY 4/2                         |
| 1062-3               | 114            | 100 | 75  | 72644B                 | 5Y 4/2                            | 143                    | 131 | 115 | 8F8373                 | 5Y 5/2                            |
| 1062-4               | 117            | 101 | 78  | 75654E                 | 5Y 4/2                            | 140                    | 139 | 127 | 8C8B7F                 | 2.5GY 6/2                         |
| 1063-1               | 148            | 135 | 102 | 948766                 | 5Y 6/4                            | 117                    | 101 | 78  | 75654E                 | 5Y 4/2                            |
| 1063-2               | 91             | 84  | 75  | 5B544B                 | 5Y 3/2                            | 89                     | 85  | 76  | 59554C                 | 7.5Y 3/2                          |
| 1063-3 <sup>c</sup>  |                |     |     |                        |                                   |                        |     |     |                        |                                   |
| 1063-4               | 132            | 124 | 107 | 847C6B                 | 7.5Y 5/2                          | 105                    | 99  | 89  | 696359                 | 7.5Y 4/2                          |
| 1063-5               | 136            | 129 | 117 | 888175                 | 7.5Y 5/2                          | 106                    | 103 | 90  | 6A675A                 | 2.5GY 4/2                         |
| 1063-6               | 109            | 105 | 92  | 6D695C                 | 10Y 4/2                           | 80                     | 79  | 78  | 504F4E                 | 2.5GY 3/2                         |
| 1063-7               | 111            | 108 | 96  | 6F6C60                 | 2.5GY 4/2                         | 122                    | 124 | 122 | 7A7C7A                 | 7.5GY 5/2                         |
| 1063-8 <sup>d</sup>  |                |     |     |                        |                                   | 117                    | 94  | 52  | 755E34                 | 5Y 4/4                            |

R: red; G: Green; B: Blue; HEX

<sup>a</sup> Segment was previously thawed and dried; no intact soil color picture possible

<sup>b</sup> Segment was previously thawed and refrozen; sample color no longer reflective of original color

<sup>c</sup> Segment is missing from the archive

<sup>d</sup> No pictures taken of this sample prior to cutting

**Table S3: Frozen bulk density**

| Segment              | Depth below ice-sediment |        |          | Core segment height (cm) | Volume (cm <sup>3</sup> ) <sup>a</sup> | Frozen mass (g) | Bulk density (g/cm <sup>3</sup> ) | Estimated ice fraction (%) <sup>b</sup> | Estimated sediment fraction (%) <sup>b</sup> |
|----------------------|--------------------------|--------|----------|--------------------------|----------------------------------------|-----------------|-----------------------------------|-----------------------------------------|----------------------------------------------|
|                      | top                      | bottom | midpoint |                          |                                        |                 |                                   |                                         |                                              |
| 1059-4 <sup>c</sup>  | 0                        | 10     | 5        | 10                       |                                        |                 |                                   |                                         |                                              |
| 1059-5               | 10                       | 20     | 15       | 10                       | 785.4                                  | 1775.0          | 2.26                              | 24                                      | 76                                           |
| 1059-6               | 20                       | 29.5   | 24.75    | 9.5                      | 746.1                                  | 1789.0          | 2.40                              | 17                                      | 83                                           |
| 1059-7               | 29.5                     | 34     | 31.75    | 4.5                      | 353.4                                  | 745.0           | 2.11                              | 33                                      | 67                                           |
| 1060-A1              | 34                       | 44.5   | 39.25    | 10.5                     | 824.7                                  | 1970.0          | 2.39                              | 17                                      | 83                                           |
| 1060-A2              | 44.5                     | 55.5   | 50       | 11                       | 863.9                                  | 1950.0          | 2.26                              | 25                                      | 75                                           |
| 1060-B <sup>d</sup>  | 55.5                     | 78.5   | 67       | 23                       |                                        |                 |                                   |                                         |                                              |
| 1060-C1              | 78.5                     | 88.5   | 83.5     | 10                       | 785.4                                  | 1755.0          | 2.23                              | 26                                      | 74                                           |
| 1060-C2              | 88.5                     | 98.5   | 93.5     | 10                       | 706.9                                  | 1100.0          | 1.56                              | 64                                      | 36                                           |
| 1060-C3              | 98.5                     | 108.5  | 103.5    | 10                       | 785.4                                  | 1285.0          | 1.64                              | 59                                      | 41                                           |
| 1060-C4              | 108.5                    | 118    | 113.25   | 9.5                      | 746.1                                  | 1067.0          | 1.43                              | 71                                      | 29                                           |
| 1060-C5              | 118                      | 129    | 123.5    | 11                       | 863.9                                  | 956.0           | 1.11                              | 89                                      | 11                                           |
| 1061-A               | 129                      | 137    | 133      | 8                        | 589.0                                  | 543.0           | 0.92                              | 99                                      | 1                                            |
| 1061-B <sup>d</sup>  | 137                      | 159    | 148      | 22                       |                                        |                 |                                   |                                         |                                              |
| 1061-C               | 159                      | 171    | 165      | 12                       | 1140.4                                 | 1155.0          | 1.01                              | 94                                      | 6                                            |
| 1061-D1              | 171                      | 181    | 176      | 10                       | 785.4                                  | 739.9           | 0.94                              | 98                                      | 2                                            |
| 1061-D2              | 181                      | 191    | 186      | 10                       | 785.4                                  | 820.0           | 1.04                              | 92                                      | 8                                            |
| 1061-D3              | 191                      | 201    | 196      | 10                       | 785.4                                  | 840.0           | 1.07                              | 91                                      | 9                                            |
| 1061-D4 <sup>e</sup> | 201                      | 215    | 208      | 14                       |                                        |                 |                                   |                                         |                                              |
| 1061-D5              | 215                      | 223    | 219      | 8                        | 628.3                                  | 976.0           | 1.55                              | 64                                      | 36                                           |
| 1062-1               | 223                      | 231    | 227      | 8                        | 628.3                                  | 1320.0          | 2.10                              | 33                                      | 67                                           |
| 1062-2               | 231                      | 238    | 234.5    | 7                        | 445.3                                  | 1050.0          | 2.36                              | 19                                      | 81                                           |
| 1062-3               | 238                      | 250    | 244      | 12                       | 942.5                                  | 1940.0          | 2.06                              | 36                                      | 64                                           |
| 1062-4               | 250                      | 263    | 256.5    | 13                       | 1021.0                                 | 2410.0          | 2.36                              | 19                                      | 81                                           |
| 1063-1 <sup>c</sup>  | 263                      | 273    | 268      | 10                       |                                        |                 |                                   |                                         |                                              |
| 1063-2               | 273                      | 283    | 278      | 10                       | 785.4                                  | 1770.0          | 2.25                              | 25                                      | 75                                           |
| 1063-3 <sup>e</sup>  | 283                      | 294.5  | 288.75   | 11.5                     |                                        |                 |                                   |                                         |                                              |
| 1063-4               | 294.5                    | 305.5  | 300      | 11                       | 863.9                                  | 2135.0          | 2.47                              | 13                                      | 87                                           |
| 1063-5               | 305.5                    | 317    | 311.25   | 11.5                     | 903.2                                  | 1755.0          | 1.94                              | 42                                      | 58                                           |
| 1063-6               | 317                      | 327    | 322      | 10                       | 785.4                                  | 1645.0          | 2.09                              | 34                                      | 66                                           |
| 1063-7               | 327                      | 340    | 333.5    | 13                       | 1021.0                                 | 2220.0          | 2.17                              | 29                                      | 71                                           |
| 1063-8               | 340                      | 344    | 342      | 4                        | 252.0                                  | 504.0           | 2.00                              | 39                                      | 61                                           |

<sup>a</sup> Volume calculated assuming segments were cylinders with a radius of 5 cm and the measured height

<sup>b</sup> Ice and sediment fractions calculated using the bulk density, assuming two endmember mixing of ice and sediment with densities of 0.9 g/cm<sup>3</sup> and 2.7 g/cm<sup>3</sup>, respectively

<sup>c</sup> Not measured due to non-cylindrical shape of sample

<sup>d</sup> Segment was previously thawed and refrozen.

<sup>e</sup> Segment missing from archive; no measurement

**Table S4: Magnetic susceptibility**

| Segment              | Depth below ice-sediment interface (cm) <sup>a</sup> | Mass (g) | Magnetic susceptibility (m <sup>3</sup> /kg) |                     |                               |
|----------------------|------------------------------------------------------|----------|----------------------------------------------|---------------------|-------------------------------|
|                      |                                                      |          | χ <sub>976Hz</sub>                           | χ <sub>3904Hz</sub> | %χ <sub>fd</sub> <sup>h</sup> |
| 1059-4 <sup>b</sup>  |                                                      |          |                                              |                     |                               |
| 1059-5               | 12                                                   | 4.6      | 7.60E-07                                     | 7.58E-07            | 0.28                          |
| 1059-6               | 22                                                   | 8.4      | 9.30E-07                                     | 9.27E-07            | 0.39                          |
| 1059-7               | 31                                                   | 4.7      | 1.33E-06                                     | 1.33E-06            | 0.22                          |
| 1060-A1              | 36                                                   | 3.6      | 1.50E-06                                     | 1.49E-06            | 0.51                          |
| 1060-A2              | 46.5                                                 | 4.5      | 8.24E-07                                     | 8.21E-07            | 0.44                          |
| 1060-B <sup>c</sup>  | 67                                                   | 2.3      | 8.14E-07                                     | 8.08E-07            | 0.68                          |
| 1060-C1              | 80.5                                                 | 5        | 1.55E-06                                     | 1.54E-06            | 0.70                          |
| 1060-C2              | 90.5                                                 | 3.7      | 6.00E-07                                     | 5.97E-07            | 0.44                          |
| 1060-C3 <sup>d</sup> | 106.5                                                | 2.8      | 1.68E-06                                     | 1.67E-06            | 0.32                          |
| 1060-C4              | 110.5                                                | 1.9      | 3.83E-07                                     | 3.82E-07            | 0.36                          |
| 1060-C5              | 120                                                  | 2.3      | 5.27E-08                                     | 5.29E-08            | 0.00                          |
| 1061-A               | 131                                                  | 2.3      | 1.20E-08                                     | 1.31E-08            | 0.00                          |
| 1061-B <sup>e</sup>  |                                                      |          |                                              |                     |                               |
| 1061-C               | 161                                                  | 2.3      | 1.94E-07                                     | 1.91E-07            | 1.33                          |
| 1061-D1              | 173                                                  | 2.4      | 4.57E-08                                     | 4.65E-08            | 0.00                          |
| 1061-D2              | 183                                                  | 3.4      | 1.21E-07                                     | 1.21E-07            | 0.23                          |
| 1061-D3 <sup>d</sup> | 193                                                  | 3.3      | 2.94E-07                                     | 2.90E-07            | 1.40                          |
| 1061-D4 <sup>f</sup> |                                                      |          |                                              |                     |                               |
| 1061-D5              | 222.5                                                | 3.6      | 1.98E-06                                     | 1.95E-06            | 1.44                          |
| 1062-1               | 225                                                  | 6.1      | 1.74E-06                                     | 1.73E-06            | 0.40                          |
| 1062-2 <sup>d</sup>  | 236                                                  | 5.6      | 2.16E-06                                     | 2.15E-06            | 0.43                          |
| 1062-3 <sup>d</sup>  | 248                                                  | 8.2      | 1.74E-06                                     | 1.74E-06            | 0.51                          |
| 1062-4               | 252                                                  | 5.3      | 2.08E-06                                     | 2.08E-06            | 0.12                          |
| 1063-1               | 272.5                                                | 3.5      | 2.23E-06                                     | 2.22E-06            | 0.36                          |
| 1063-2 <sup>g</sup>  | 275                                                  | 7.8      | 2.08E-06                                     | 2.07E-06            | 0.35                          |
| 1063-3 <sup>f</sup>  |                                                      |          |                                              |                     |                               |
| 1063-4 <sup>g</sup>  | 305                                                  | 5        | 1.60E-06                                     | 1.59E-06            | 0.68                          |
| 1063-5               | 307.5                                                | 8.4      | 1.88E-06                                     | 1.88E-06            | 0.42                          |
| 1063-6               | 319                                                  | 11.1     | 2.07E-06                                     | 2.06E-06            | 0.37                          |
| 1063-7 <sup>a</sup>  |                                                      |          |                                              |                     |                               |
| 1063-8               | 343                                                  | 4.8      | 1.64E-06                                     | 1.64E-06            | 0.07                          |

<sup>a</sup> Reported depths are the midpoint depths of 2 cm-tall plastic cubes.

<sup>b</sup> Pilot sample; no measurement

<sup>c</sup> Segment was previously thawed, dried, loose sediment. Orientation not preserved. Measurement is on bulk sediment. Depth is median of segment.

<sup>d</sup> Segment was stored stratigraphically upside down. This has no impact on suscepti

<sup>e</sup> Segment was previously thawed and re-frozen. No measurement

<sup>f</sup> Segment is missing from the archive; no measurement

<sup>g</sup> Sub-sample stabilized in pmag cube with plastic wrap.

<sup>h</sup> %χ<sub>fd</sub> is calculated as 100\*(χ<sub>976Hz</sub> - χ<sub>3904Hz</sub>)/(χ<sub>976Hz</sub>)

Table S5 Natural Remanent Magnetization

| Segment              | Depth below ice-sediment interface (cm) <sup>a</sup> | Mass (g) | 0 mT AF Demagnetization Level |            |                            | 10 mT AF Demagnetization Level |             |                             | 20 mT AF Demagnetization Level |             |                             |
|----------------------|------------------------------------------------------|----------|-------------------------------|------------|----------------------------|--------------------------------|-------------|-----------------------------|--------------------------------|-------------|-----------------------------|
|                      |                                                      |          | DEC0 (deg)                    | INC0 (deg) | INT0 (Am <sup>2</sup> /kg) | DEC10 (deg)                    | INC10 (deg) | INT10 (Am <sup>2</sup> /kg) | DEC20 (deg)                    | INC20 (deg) | INT20 (Am <sup>2</sup> /kg) |
| 1059-4 <sup>b</sup>  |                                                      |          |                               |            |                            |                                |             |                             |                                |             |                             |
| 1059-5               | 12                                                   | 4.6      | 89.0                          | 3.0        | 1.32E-05                   | 60.0                           | 26.0        | 1.18E-05                    | 21.0                           | 56.0        | 1.11E-05                    |
| 1059-6               | 22                                                   | 8.4      | 42.0                          | 28.0       | 1.10E-05                   | 44.0                           | 33.0        | 1.15E-05                    | 39.0                           | 10.0        | 9.90E-06                    |
| 1059-7               | 31                                                   | 4.7      | 9.0                           | 54.0       | 1.10E-05                   | 14.0                           | 37.0        | 5.18E-06                    | 13.0                           | 31.0        | 7.46E-06                    |
| 1060-A1              | 36                                                   | 3.6      | 68.0                          | 60.0       | 3.30E-05                   | 68.0                           | 58.0        | 3.53E-05                    | 55.0                           | 51.0        | 3.02E-05                    |
| 1060-A2              | 46.5                                                 | 4.5      | 9.0                           | 17.0       | 3.29E-05                   | 9.0                            | 19.0        | 3.27E-05                    | 11.0                           | 19.0        | 2.82E-05                    |
| 1060-B <sup>c</sup>  | 67                                                   | 2.3      |                               |            |                            |                                |             |                             |                                |             |                             |
| 1060-C1              | 80.5                                                 | 5        | 1.0                           | 3.0        | 6.22E-05                   | 355.0                          | 4.0         | 5.64E-05                    | 354.0                          | 4.0         | 4.75E-05                    |
| 1060-C2              | 90.5                                                 | 3.7      | 255.0                         | 78.0       | 8.90E-06                   | 13.0                           | -10.0       | 6.70E-06                    | 30.0                           | 31.0        | 7.31E-06                    |
| 1060-C3 <sup>d</sup> | 106.5                                                | 2.8      | 317.5                         | 45.7       | 1.45E-05                   | 7.2                            | 63.8        | 1.72E-05                    | 357.5                          | 57.6        | 1.66E-05                    |
| 1060-C4              | 110.5                                                | 1.9      | 171.0                         | 42.0       | 8.01E-06                   | 83.0                           | 38.0        | 1.90E-05                    | 46.0                           | 14.0        | 7.82E-06                    |
| 1060-C5              | 120                                                  | 2.3      | 12.0                          | 30.0       | 1.96E-06                   | 203.0                          | -62.0       | 1.03E-06                    | 24.0                           | 44.0        | 8.27E-07                    |
| 1061-A               | 131                                                  | 2.3      | 43.0                          | -18.0      | 4.86E-07                   | 12.0                           | -21.0       | 6.75E-07                    | 8.0                            | 6.0         | 9.77E-07                    |
| 1061-B <sup>e</sup>  |                                                      |          |                               |            |                            |                                |             |                             |                                |             |                             |
| 1061-C               | 161                                                  | 2.3      | 97.0                          | 26.0       | 1.68E-05                   | 3.0                            | 23.0        | 1.04E-05                    | 23.0                           | 4.0         | 1.16E-05                    |
| 1061-D1              | 173                                                  | 2.4      | 303.0                         | 84.0       | 1.17E-06                   | 285.0                          | -23.0       | 3.89E-06                    | 323.0                          | -35.0       | 3.04E-06                    |
| 1061-D2              | 183                                                  | 3.4      | 135.0                         | 3.0        | 6.97E-06                   | 37.0                           | 40.0        | 4.64E-06                    | 33.0                           | 11.0        | 6.51E-06                    |
| 1061-D3 <sup>d</sup> | 193                                                  | 3.3      | 177.4                         | -17.5      | 4.59E-06                   | 338.1                          | -53.0       | 2.49E-06                    | 326.3                          | -39.8       | 9.78E-07                    |
| 1061-D4 <sup>f</sup> |                                                      |          |                               |            |                            |                                |             |                             |                                |             |                             |
| 1061-D5              | 222.5                                                | 3.6      | 91.0                          | 75.0       | 1.56E-04                   | 68.0                           | 80.0        | 1.34E-04                    | 324.0                          | -44.0       | 1.39E-06                    |
| 1062-1               | 225                                                  | 6.1      | 284.0                         | 87.0       | 2.04E-05                   | 270.0                          | 77.0        | 1.29E-05                    | 325.0                          | 20.0        | 4.13E-06                    |
| 1062-2 <sup>d</sup>  | 236                                                  | 5.6      | 281.1                         | -31.7      | 4.90E-05                   | 308.8                          | -10.9       | 2.77E-05                    | 39.3                           | 13.4        | 9.90E-05                    |
| 1062-3 <sup>d</sup>  | 248                                                  | 8.2      | 266.4                         | 10.2       | 2.42E-05                   | 109.5                          | -4.6        | 1.69E-05                    | 325.6                          | -33.2       | 2.63E-05                    |
| 1062-4               | 252                                                  | 5.3      | 41.0                          | 18.0       | 6.67E-06                   | 30.0                           | -17.0       | 1.17E-05                    | 360.0                          | 20.0        | 1.33E-05                    |
| 1063-1               | 272.5                                                | 3.5      | 152.0                         | 21.0       | 3.82E-05                   | 153.0                          | 20.0        | 2.31E-05                    | 32.0                           | 9.0         | 2.90E-05                    |
| 1063-2 <sup>g</sup>  | 275                                                  | 7.8      | 66.0                          | 61.0       | 3.90E-05                   | 63.0                           | 66.0        | 3.43E-05                    | 71.0                           | 66.0        | 3.51E-05                    |
| 1063-3 <sup>f</sup>  |                                                      |          |                               |            |                            |                                |             |                             |                                |             |                             |
| 1063-4 <sup>g</sup>  | 305                                                  | 5        | 311.0                         | -36.5      | 3.41E-05                   | 339.3                          | -36.1       | 4.50E-05                    | 350.0                          | -6.5        | 6.31E-05                    |
| 1063-5               | 307.5                                                | 8.4      | 115.0                         | 71.0       | 4.99E-05                   | 95.0                           | 81.0        | 4.10E-05                    | 22.0                           | 58.0        | 3.44E-05                    |
| 1063-6               | 319                                                  | 11.1     | 93.0                          | 72.0       | 9.40E-05                   | 64.0                           | 71.0        | 8.53E-05                    | 58.0                           | 65.0        | 6.45E-05                    |
| 1063-7 <sup>a</sup>  |                                                      |          |                               |            |                            |                                |             |                             |                                |             |                             |
| 1063-8               | 343                                                  | 4.8      | 308.0                         | 38.0       | 1.19E-05                   | 353.0                          | 42.0        | 4.31E-05                    | 342.0                          | -2.0        | 1.00E-04                    |

DEC: declination; INC: inclination; INT: intensity of remnance

<sup>a</sup> Reported depths are the midpoint depths of 2 cm-tall plastic cubes.

<sup>b</sup> Pilot sample; no measurement

<sup>c</sup> Segment was previously thawed, dried, loose sediment. Orientation not preserved. Measurement is on bulk sediment. Depth is median of segment.

<sup>d</sup> Segment was stored stratigraphically upside down. INC and DEC reported here are corrected.

<sup>e</sup> Segment was previously thawed and re-frozen. No measurement

<sup>f</sup> Segment is missing from the archive; no measurement

<sup>g</sup> Sub-sample stabilized in pmag cube with plastic wrap

**Table S6: Pore ice pH and conductivity**

| Segment               | Depth (cm below ice-sediment interface (cm)) |        |          | pH   | Conductivity (µS) |
|-----------------------|----------------------------------------------|--------|----------|------|-------------------|
|                       | Top                                          | Bottom | Midpoint |      |                   |
| 1059-4 <sup>a</sup>   | 0.0                                          | 10.0   | 5.0      |      |                   |
| 1059-5                | 10.0                                         | 20.0   | 15.0     | 7.12 | 129               |
| 1059-6                | 20.0                                         | 29.5   | 24.8     | 7.26 | 252               |
| 1059-7 <sup>b</sup>   | 29.5                                         | 34.0   | 31.8     |      |                   |
| 1060-A1               | 34.0                                         | 44.5   | 39.3     | 7.15 | 151               |
| 1060-A2               | 44.5                                         | 55.5   | 50.0     | 7.21 | 118               |
| 1060-B <sup>c</sup>   | 55.5                                         | 78.5   | 67.0     |      |                   |
| 1060-C1               | 78.5                                         | 88.5   | 83.5     | 6.94 | 219               |
| 1060-C2               | 88.5                                         | 98.5   | 93.5     | 7.17 | 168               |
| 1060-C3               | 98.5                                         | 108.5  | 103.5    | 7.13 | 334               |
| 1060-C4sediment       | 108.5                                        | 112.5  | 110.5    | 7.18 | 502               |
| 1060-C4ice            | 112.5                                        | 118.0  | 115.3    | 6.98 | 157               |
| 1060-C5               | 118.0                                        | 129.0  | 123.5    | 7.18 | 59                |
| 1061-A                | 129.0                                        | 137.0  | 133.0    | 7.13 | 172               |
| 1061-B <sup>d</sup>   | 137.0                                        | 159.0  | 148.0    | 7.85 | 171               |
| 1061-C                | 159.0                                        | 171.0  | 165.0    | 7.58 | 54                |
| 1061-D1               | 171.0                                        | 181.0  | 176.0    | 7.85 | 52                |
| 1061-D2               | 181.0                                        | 191.0  | 186.0    | 7.65 | 75                |
| 1061-D3               | 191.0                                        | 201.0  | 196.0    | 7.23 | 95                |
| 1061-D4 <sup>e</sup>  | 201.0                                        | 215.0  | 207.0    |      |                   |
| 1061-D5               | 215.0                                        | 223.0  | 219.0    | 6.84 | 330               |
| 1062-1                | 223.0                                        | 231.0  | 227.0    | 6.97 | 692               |
| 1062-2                | 231.0                                        | 238.0  | 234.5    | 6.90 | 809               |
| 1062-3                | 238.0                                        | 250.0  | 244.0    | 7.04 | 693               |
| 1062-4                | 250.0                                        | 263.0  | 256.5    | 6.90 | 1066              |
| 1063-1                | 263.0                                        | 273.0  | 268.0    | 6.95 | 723               |
| 1063-2                | 273.0                                        | 283.0  | 278.0    | 6.95 | 679               |
| 1063-3 <sup>e</sup>   | 283.0                                        | 294.5  | 288.8    |      |                   |
| 1063-4                | 294.5                                        | 305.5  | 300.0    | 7.09 | 385               |
| 1063-5                | 305.5                                        | 317.0  | 311.3    | 6.87 | 178               |
| 1063-6 <sup>f</sup>   | 317.0                                        | 327.0  | 322.0    | n/a  | n/a               |
| 1063-7 <sup>a</sup>   | 327.0                                        | 340.0  | 333.5    | n/a  | n/a               |
| 1063-8 <sup>a,f</sup> | 340.0                                        | 344.0  | 342.0    | n/a  | n/a               |

<sup>a</sup> Pilot sample; no measurement

<sup>b</sup> Insufficient water extracted to measure pH and conductivity

<sup>c</sup> Segment was previously thawed, no ice preserved

<sup>d</sup> Segment was previously thawed and re-frozen. Measurement may be erroneous

<sup>e</sup> Segment is missing from the archive

<sup>f</sup> Water could not be extracted from this sub-sample.

**Table S7: Sediment and ice content by mass**

| Segment              | Depth below ice-sediment interface (cm) |        |          | Total ice mass (g) | Total sediment mass (g) | % Ice by mass | % Sediment by mass |
|----------------------|-----------------------------------------|--------|----------|--------------------|-------------------------|---------------|--------------------|
|                      | Top                                     | Bottom | Midpoint |                    |                         |               |                    |
| 1059-4               | 0.0                                     | 10.0   | 5.0      | 45.0               | 237.2                   | 16            | 84                 |
| 1059-5               | 10.0                                    | 20.0   | 15.0     | 39.1               | 233.7                   | 14            | 86                 |
| 1059-6               | 20.0                                    | 29.5   | 24.8     | 95.7               | 579.3                   | 14            | 86                 |
| 1059-7               | 29.5                                    | 34.0   | 31.8     | 33.3               | 197.4                   | 14            | 86                 |
| 1060-A1              | 34.0                                    | 44.5   | 39.3     | 122.3              | 617.7                   | 17            | 83                 |
| 1060-A2              | 44.5                                    | 55.5   | 50.0     | 85.4               | 450.1                   | 16            | 84                 |
| 1060-B <sup>a</sup>  | 55.5                                    | 78.5   | 67.0     |                    |                         |               |                    |
| 1060-C1              | 78.5                                    | 88.5   | 83.5     | 139.8              | 501.9                   | 22            | 78                 |
| 1060-C2              | 88.5                                    | 98.5   | 93.5     | 241.8              | 254.5                   | 49            | 51                 |
| 1060-C3              | 98.5                                    | 108.5  | 103.5    | 223.3              | 327.5                   | 41            | 59                 |
| 1060-C4sediment      | 108.5                                   | 112.5  | 110.5    | 38.4               | 125.7                   | 23            | 77                 |
| 1060-C4ice           | 112.5                                   | 118.0  | 115.3    | 79.8               | 8.7                     | 90            | 10                 |
| 1060-C5              | 118.0                                   | 129.0  | 123.5    | 86.3               | 5.3                     | 94            | 6                  |
| 1061-A               | 129.0                                   | 137.0  | 133.0    | 80.9               | 3.0                     | 96            | 4                  |
| 1061-B <sup>a</sup>  | 137.0                                   | 159.0  | 148.0    | 96.7               | 23.2                    | 81            | 19                 |
| 1061-C               | 159.0                                   | 171.0  | 165.0    | 152.1              | 16.8                    | 90            | 10                 |
| 1061-D1              | 171.0                                   | 181.0  | 176.0    | 108.3              | 11.1                    | 91            | 9                  |
| 1061-D2              | 181.0                                   | 191.0  | 186.0    | 126.8              | 27.1                    | 82            | 18                 |
| 1061-D3              | 191.0                                   | 201.0  | 196.0    | 120.7              | 27.4                    | 82            | 18                 |
| 1061-D4 <sup>b</sup> | 201.0                                   | 215.0  | 208.0    |                    |                         |               |                    |
| 1061-D5              | 215.0                                   | 223.0  | 219.0    | 364.8              | 594.5                   | 38            | 62                 |
| 1062-1               | 223.0                                   | 231.0  | 227.0    | 60.9               | 395.3                   | 13            | 87                 |
| 1062-2               | 231.0                                   | 238.0  | 234.5    | 28.8               | 219.3                   | 12            | 88                 |
| 1062-3               | 238.0                                   | 250.0  | 244.0    | 76.8               | 590.3                   | 12            | 88                 |
| 1062-4               | 250.0                                   | 263.0  | 256.5    | 87.0               | 806.9                   | 10            | 90                 |
| 1063-1               | 263.0                                   | 273.0  | 268.0    | 38.7               | 464.5                   | 8             | 92                 |
| 1063-2               | 273.0                                   | 283.0  | 278.0    | 62.6               | 560.4                   | 10            | 90                 |
| 1063-3 <sup>b</sup>  | 283.0                                   | 294.5  | 288.8    |                    |                         |               |                    |
| 1063-4               | 294.5                                   | 305.5  | 300.0    | 32.0               | 790.3                   | 4             | 96                 |
| 1063-5               | 305.5                                   | 317.0  | 311.3    | 79.9               | 545.5                   | 13            | 87                 |
| 1063-6               | 317.0                                   | 327.0  | 322.0    | 46.6               | 571.9                   | 8             | 92                 |
| 1063-7               | 327.0                                   | 340.0  | 333.5    | 57.9               | 220.9                   | 21            | 79                 |
| 1063-8               | 340.0                                   | 344.0  | 342.0    | 28.0               | 172.3                   | 14            | 86                 |

Note sediment and ice masses reflect those measured from sub-samples (a) and (b). The total ice mass was calculated by adding the pore ice meltwater extracted from each sample and the estimated mass of water in the remaining bulk sediment, which is based on the %water lost from the bulk geological aliquot.

<sup>a</sup> Segment was previously thawed and refrozen. Grain size distribution may be erroneous

<sup>b</sup> Segment missing from archive; no measurement



**Table S8: Grain size distribution**

| Sample               | Depth below ice-sediment |        |          | Grain size ( $\mu\text{m}$ ) distribution |          |         |         |         |        |       |
|----------------------|--------------------------|--------|----------|-------------------------------------------|----------|---------|---------|---------|--------|-------|
|                      | Top                      | Bottom | Midpoint | >2000                                     | 850-2000 | 500-850 | 250-500 | 125-250 | 63-125 | <63   |
| 1059-4 <sup>a</sup>  | 0                        | 10     | 5        | 12.0%                                     | 19.5%    | 23.8%   | 21.3%   | 9.7%    | 13.7%  |       |
| 1059-5               | 10                       | 20     | 15       | 0.7%                                      | 8.8%     | 19.6%   | 38.6%   | 21.0%   | 4.8%   | 6.5%  |
| 1059-6               | 20                       | 29.5   | 24.75    | 0.4%                                      | 5.2%     | 14.5%   | 42.1%   | 22.1%   | 9.6%   | 6.0%  |
| 1059-7               | 29.5                     | 34     | 31.75    | 0.2%                                      | 1.8%     | 4.5%    | 22.3%   | 26.6%   | 19.7%  | 24.8% |
| 1060-A1              | 34                       | 44.5   | 39.25    | 0.0%                                      | 0.2%     | 3.1%    | 52.4%   | 19.9%   | 11.3%  | 13.1% |
| 1060-A2              | 44.5                     | 55.5   | 50       | 1.8%                                      | 7.4%     | 25.0%   | 43.3%   | 14.6%   | 2.4%   | 5.6%  |
| 1060-B <sup>a</sup>  | 55.5                     | 78.5   | 67       | 0.1%                                      | 0.3%     | 0.5%    | 5.0%    | 42.9%   | 24.6%  | 26.6% |
| 1060-C1              | 78.5                     | 88.5   | 83.5     | 0.0%                                      | 0.1%     | 0.3%    | 7.0%    | 53.3%   | 21.0%  | 18.3% |
| 1060-C2              | 88.5                     | 98.5   | 93.5     | 10.4%                                     | 0.1%     | 0.1%    | 0.8%    | 26.1%   | 34.9%  | 27.6% |
| 1060-C3              | 98.5                     | 108.5  | 103.5    | 30.0%                                     | 5.0%     | 6.4%    | 18.5%   | 13.8%   | 9.5%   | 16.8% |
| 1060-C4sediment      | 108.5                    | 112.5  | 110.5    | 76.6%                                     | 1.7%     | 2.9%    | 5.3%    | 5.4%    | 3.4%   | 4.7%  |
| 1060-C4ice           | 112.5                    | 118    | 115.25   | 1.5%                                      | 1.3%     | 1.3%    | 3.7%    | 3.9%    | 3.1%   | 85.2% |
| 1060-C5              | 118                      | 129    | 123.5    | 4.3%                                      | 0.5%     | 1.4%    | 4.8%    | 3.8%    | 0.5%   | 84.7% |
| 1061-A               | 129                      | 137    | 133      | 0.4%                                      | 3.3%     | 1.2%    | 5.4%    | 5.0%    | 1.7%   | 83.0% |
| 1061-B <sup>a</sup>  | 137                      | 159    | 148      | 0.0%                                      | 0.4%     | 0.8%    | 1.7%    | 4.9%    | 5.7%   | 86.5% |
| 1061-C               | 159                      | 171    | 165      | 2.4%                                      | 1.5%     | 1.8%    | 4.9%    | 5.7%    | 6.0%   | 77.8% |
| 1061-D1              | 171                      | 181    | 176      | 0.1%                                      | 1.5%     | 2.3%    | 6.5%    | 9.6%    | 7.1%   | 72.8% |
| 1061-D2              | 181                      | 191    | 186      | 0.6%                                      | 2.3%     | 4.5%    | 9.3%    | 9.4%    | 11.2%  | 62.8% |
| 1061-D3              | 191                      | 201    | 196      | 1.7%                                      | 1.3%     | 3.4%    | 6.7%    | 6.9%    | 6.0%   | 74.2% |
| 1061-D4 <sup>b</sup> | 201                      | 215    | 207      |                                           |          |         |         |         |        |       |
| 1061-D5              | 215                      | 223    | 219      | 74.8%                                     | 0.4%     | 0.7%    | 1.8%    | 1.8%    | 1.3%   | 19.2% |
| 1062-1               | 223                      | 231    | 227      | 26.8%                                     | 5.3%     | 7.0%    | 13.7%   | 12.8%   | 8.1%   | 26.2% |
| 1062-2               | 231                      | 238    | 234.5    | 8.7%                                      | 7.3%     | 11.1%   | 14.2%   | 14.8%   | 9.5%   | 34.5% |
| 1062-3               | 238                      | 250    | 244      | 25.2%                                     | 7.2%     | 13.1%   | 15.9%   | 14.9%   | 7.0%   | 16.7% |
| 1062-4               | 250                      | 263    | 256.5    | 20.9%                                     | 6.1%     | 13.0%   | 12.9%   | 10.3%   | 9.8%   | 27.0% |
| 1063-1               | 263                      | 273    | 268      | 17.9%                                     | 6.2%     | 12.2%   | 14.1%   | 12.4%   | 6.6%   | 30.5% |
| 1063-2               | 273                      | 283    | 278      | 18.2%                                     | 7.1%     | 11.9%   | 15.4%   | 10.5%   | 7.7%   | 29.1% |
| 1063-3 <sup>b</sup>  | 283                      | 294.5  | 288.75   |                                           |          |         |         |         |        |       |
| 1063-4               | 294.5                    | 305.5  | 300      | 46.2%                                     | 4.4%     | 7.3%    | 9.1%    | 7.4%    | 4.6%   | 21.0% |
| 1063-5               | 305.5                    | 317    | 311.25   | 14.5%                                     | 8.7%     | 19.8%   | 17.4%   | 9.0%    | 5.6%   | 24.9% |
| 1063-6               | 317                      | 327    | 322      | 9.8%                                      | 6.7%     | 10.4%   | 17.8%   | 12.9%   | 9.1%   | 33.2% |
| 1063-7 <sup>a</sup>  | 327                      | 340    | 333.5    | 12.4%                                     | 5.9%     | 8.2%    | 13.9%   | 11.7%   | 47.8%  |       |
| 1063-8               | 340                      | 344    | 342      | 66.0%                                     | 3.1%     | 4.4%    | 6.5%    | 6.9%    | 4.9%   | 8.2%  |

<sup>a</sup> Pilot sample was not sieved at finer sizes less than the 125  $\mu\text{m}$  fraction. The value reported for 63-125  $\mu\text{m}$  represents all material <125  $\mu\text{m}$

<sup>b</sup> Segment was previously thawed and refrozen. Grain size distribution may be erroneous

<sup>c</sup> Segment is missing from archive; no measurement

**Table S9: Evidence of segment alteration during storage**

| <b>Sample</b>        | <b>Flat icy backside visible in 3D model and sample pictures (implication: partial thawing while core tube was stored horizontally prior to cutting in 1972)</b> | <b>Diameter of the top is less than the bottom of the segment (implication: downward deformation from vertical storage between 1972-2021)</b> |
|----------------------|------------------------------------------------------------------------------------------------------------------------------------------------------------------|-----------------------------------------------------------------------------------------------------------------------------------------------|
| 1059-4               | Yes                                                                                                                                                              | Unknown. Could not measure dimensions as it was cut during pilot study                                                                        |
| 1059-5               | Yes                                                                                                                                                              | Yes                                                                                                                                           |
| 1059-6               | Yes                                                                                                                                                              | Yes                                                                                                                                           |
| 1059-7               | Yes                                                                                                                                                              | No                                                                                                                                            |
| 1060-A1              | Unclear                                                                                                                                                          | No                                                                                                                                            |
| 1060-A2              | Unclear                                                                                                                                                          | Yes                                                                                                                                           |
| 1060-B <sup>a</sup>  | Unknown; thawed sediment                                                                                                                                         | Unknown; thawed sediment                                                                                                                      |
| 1060-C1              | Yes                                                                                                                                                              | Yes                                                                                                                                           |
| 1060-C2              | Yes; note: 3D model failed for this sample but this can be seen in the sample photos                                                                             | No                                                                                                                                            |
| 1060-C3              | Yes                                                                                                                                                              | Yes                                                                                                                                           |
| 1060-C4              | Yes                                                                                                                                                              | Yes. Sample was stored upside down vertical so deformation was from base to top                                                               |
| 1060-C5              | Yes                                                                                                                                                              | no                                                                                                                                            |
| 1061-A               | Yes                                                                                                                                                              | Yes, but this could be because it is the top of the core tube and had smaller dimensions                                                      |
| 1061-B <sup>b</sup>  | Unknown; sample was thawed and refrozen                                                                                                                          | Unknown; thawed and refrozen ice                                                                                                              |
| 1061-C               | Unknown; sample fractured horizontally in storage making it difficult to see a flat surface                                                                      | Yes                                                                                                                                           |
| 1061-D1              | Yes                                                                                                                                                              | No                                                                                                                                            |
| 1061-D2              | Yes                                                                                                                                                              | Yes                                                                                                                                           |
| 1061-D3              | Yes                                                                                                                                                              | Yes. Sample was stored upside down vertical so deformation was from base to top                                                               |
| 1061-D4 <sup>c</sup> | Unknown; missing sample                                                                                                                                          | Unknown; missing sample                                                                                                                       |
| 1061-D5              | Unknown; fragile sample with non-cylindrical geometry                                                                                                            | Unclear; fragile sample with non-cylindrical geometry that was difficult to measure                                                           |
| 1062-1               | No                                                                                                                                                               | No                                                                                                                                            |
| 1062-2               | No                                                                                                                                                               | Unclear; sample has non-cylindrical geometry (missing clast). Sample was stored upside-down                                                   |
| 1062-3               | No                                                                                                                                                               | Yes; sample store upside down                                                                                                                 |
| 1062-4               | No                                                                                                                                                               | No                                                                                                                                            |
| 1063-1               | Unclear; fragile sample with non-cylindrical geometry made it impossible to construct a 3D model.                                                                | Unclear; fragile sample with non-cylindrical geometry that was difficult to measure                                                           |
| 1063-2               | No                                                                                                                                                               | Yes                                                                                                                                           |
| 1063-3 <sup>c</sup>  | Unknown; missing sample                                                                                                                                          | Unknown; missing sample                                                                                                                       |
| 1063-4               | No                                                                                                                                                               | No; sample stored upside down.                                                                                                                |
| 1063-5               | No                                                                                                                                                               | No                                                                                                                                            |
| 1063-6               | No                                                                                                                                                               | No                                                                                                                                            |
| 1063-7               | No                                                                                                                                                               | Unknown. Could not measure dimensions as it was cut during pilot study                                                                        |
| 1063-8 <sup>d</sup>  | Unknown; fragile sample with non-cylindrical geometry and 3D model not available.                                                                                | Unknown; fragile sample with non-cylindrical geometry that was difficult to measure                                                           |

<sup>a</sup> Segment was previously thawed and dried;

<sup>b</sup> Segment was previously thawed and refrozen;

<sup>c</sup> Segment is missing from the archive

<sup>d</sup> No pictures taken of this sample prior to cutting

Table S10. Ice content data used for Figure S1

| Segment              | Measured % Ice by | Segment              | Estimated ice fraction |
|----------------------|-------------------|----------------------|------------------------|
| 1059-4               | 16                | 1059-4 <sup>c</sup>  |                        |
| 1059-5               | 14                | 1059-5               | 24                     |
| 1059-6               | 14                | 1059-6               | 17                     |
| 1059-7               | 14                | 1059-7               | 33                     |
| 1060-A1              | 17                | 1060-A1              | 17                     |
| 1060-A2              | 16                | 1060-A2              | 25                     |
| 1060-B <sup>a</sup>  |                   | 1060-B <sup>d</sup>  |                        |
| 1060-C1              | 22                | 1060-C1              | 26                     |
| 1060-C2              | 49                | 1060-C2              | 64                     |
| 1060-C3              | 41                | 1060-C3              | 59                     |
| 1060-C4              | 47                | 1060-C4              | 71                     |
| 1060-C5              | 94                | 1060-C5              | 89                     |
| 1061-A               | 96                | 1061-A               | 99                     |
| 1061-B <sup>a</sup>  | 81                | 1061-B <sup>d</sup>  |                        |
| 1061-C               | 90                | 1061-C               | 94                     |
| 1061-D1              | 91                | 1061-D1              | 98                     |
| 1061-D2              | 82                | 1061-D2              | 92                     |
| 1061-D3              | 82                | 1061-D3              | 91                     |
| 1061-D4 <sup>b</sup> |                   | 1061-D4 <sup>e</sup> |                        |
| 1061-D5              | 38                | 1061-D5              | 64                     |
| 1062-1               | 13                | 1062-1               | 33                     |
| 1062-2               | 12                | 1062-2               | 19                     |
| 1062-3               | 12                | 1062-3               | 36                     |
| 1062-4               | 10                | 1062-4               | 19                     |
| 1063-1               | 8                 | 1063-1 <sup>c</sup>  |                        |
| 1063-2               | 10                | 1063-2               | 25                     |
| 1063-3 <sup>b</sup>  |                   | 1063-3 <sup>e</sup>  |                        |
| 1063-4               | 4                 | 1063-4               | 13                     |
| 1063-5               | 13                | 1063-5               | 42                     |
| 1063-6               | 8                 | 1063-6               | 34                     |
| 1063-7               | 21                | 1063-7               | 29                     |
| 1063-8               | 14                | 1063-8               | 39                     |

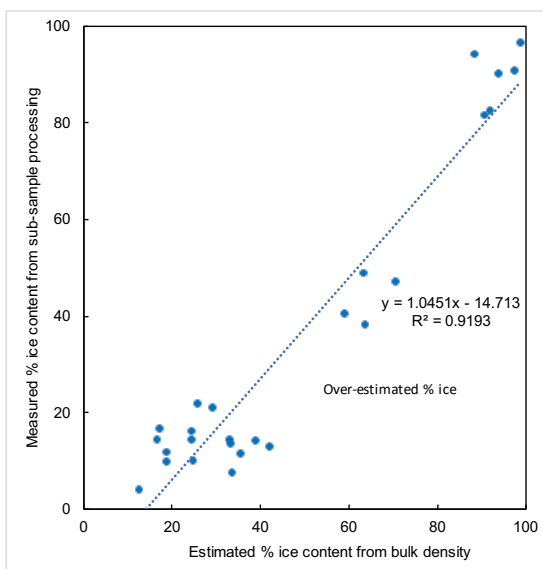

Figure S1. Comparison of ice content measured during sample processing and estimated from bulk density.
